# Supplementary material for: Generation of iPSC lines from archived non-cryoprotected biobanked dura mater
Source: PubMed Central journal article supplement (PMC3895779; doi:10.1186/2051-5960-2-4), 2014-01-07
Supplement: 2051-5960-2-4-S2.pdf [file 2051-5960-2-4-S2.pdf]

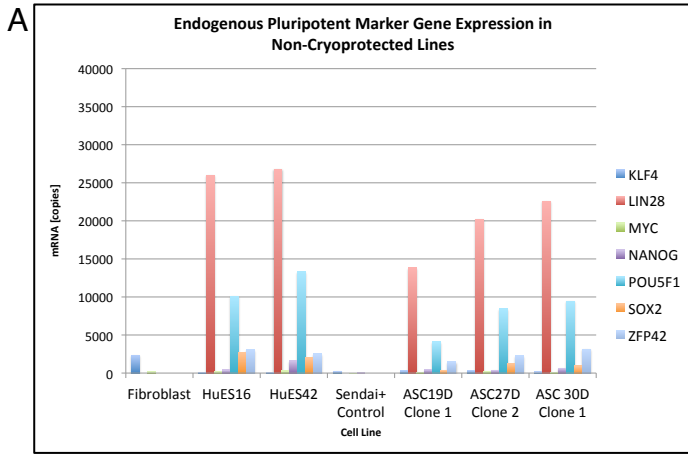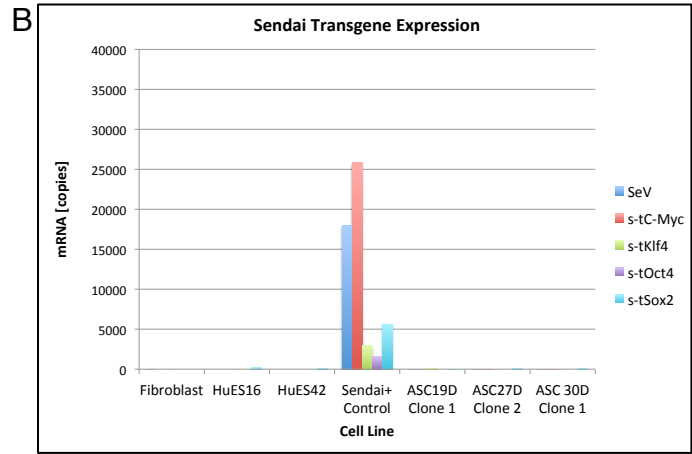

**Additional File 2, Related to Figure 3: Additional characterization of dura-derived iPSCs.** (A) Nanostring analysis for endogenous stem cell genes and (B) shutoff of Sendai transgenes for ASC19D-ALS (clone 1), ASC27D-HD (clone 2), and ASC30D-PD (clone 1). Hues16 and Hues42 were used as positive controls for endogenous stem cell genes, unrelated fibroblasts as a negative control, and infected unrelated fibroblasts as a positive control for Sendai transgene expression.
